# Supplementary material for: Epigenetic regulation of placental gene expression in transcriptional subtypes of preeclampsia
Source: PubMed Central journal article supplement (PMC5833042; doi:10.1186/s13148-018-0463-6), 2018-03-02

**A) Module 1 (N = 293; p < 0.01):**

Built around *DCN*, *MMP2*, *LAMB2*, *LAMB3*, *LAMC2*, and *COL17A1*

Involved in TGF-beta signaling, focal adhesion, and glycosaminoglycan biosynthesis

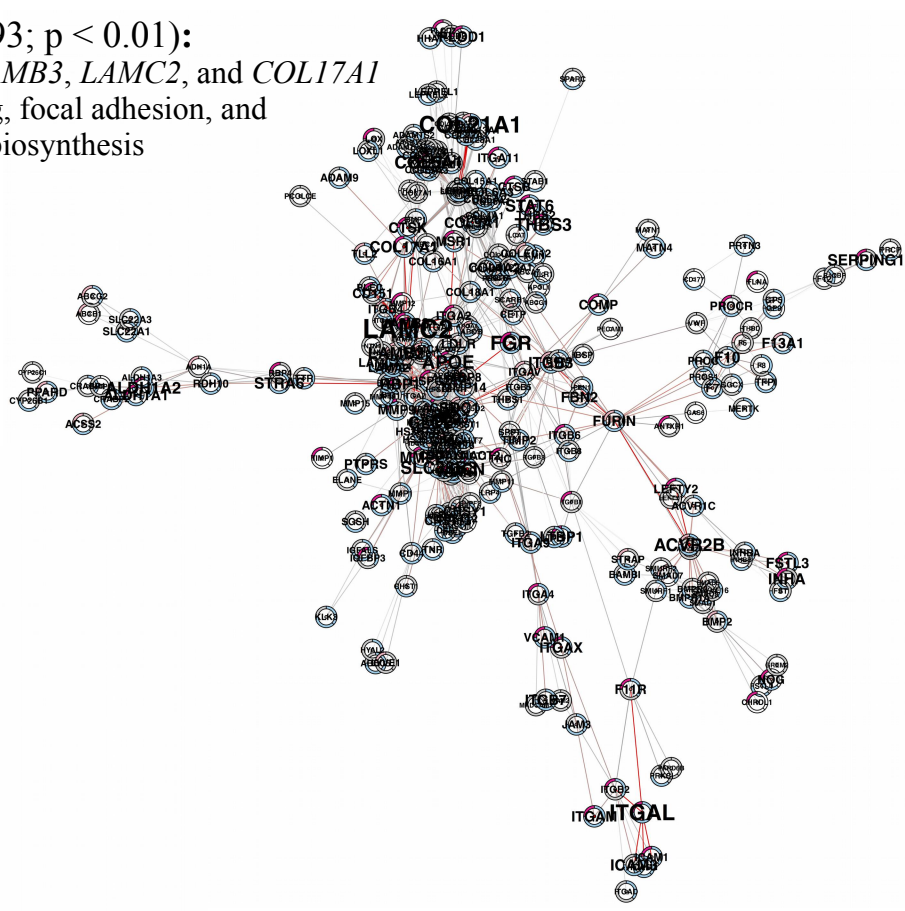

**B) Module 2 (N = 242; p < 0.01):**

Built around *LAT*, *HLA-DRA*, *HLA-DQA2*, *CD74*, *HLA-DOA*, *HLA-E*, *HLA-G*, *HLA-DPA1*, *CTSS*, *HLA-DMB*, *HLA-F*, *B2M*, *TAP1*, and *TAP2*

Involved in antigen processing/presentation and allograft rejection

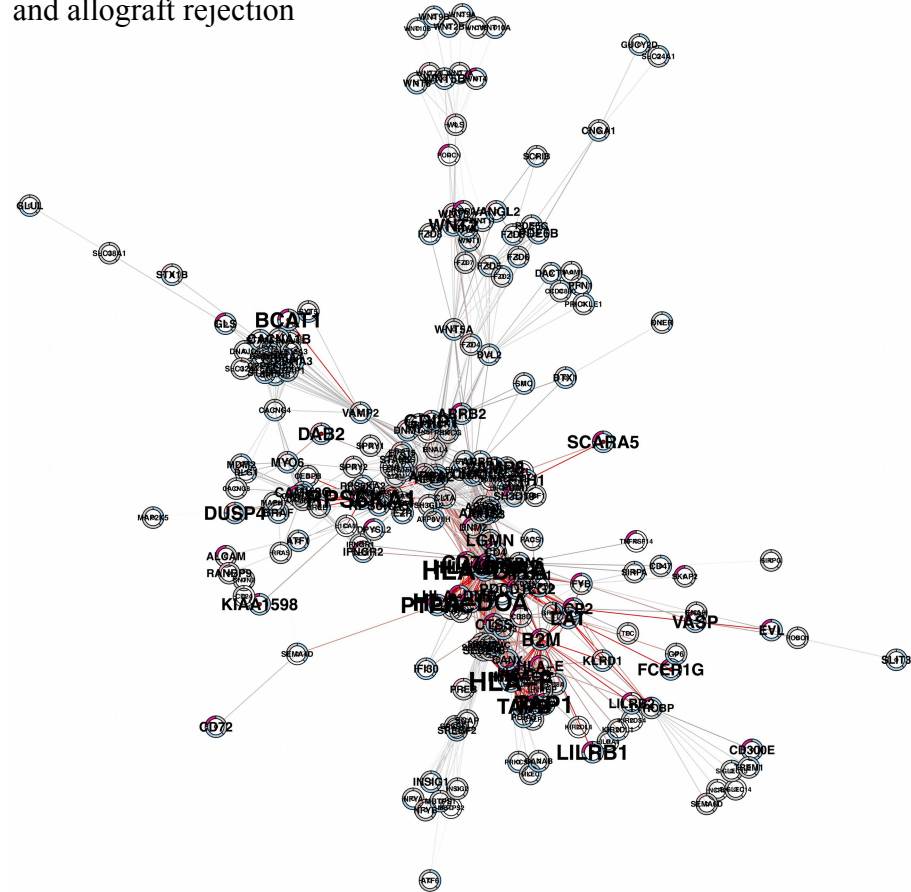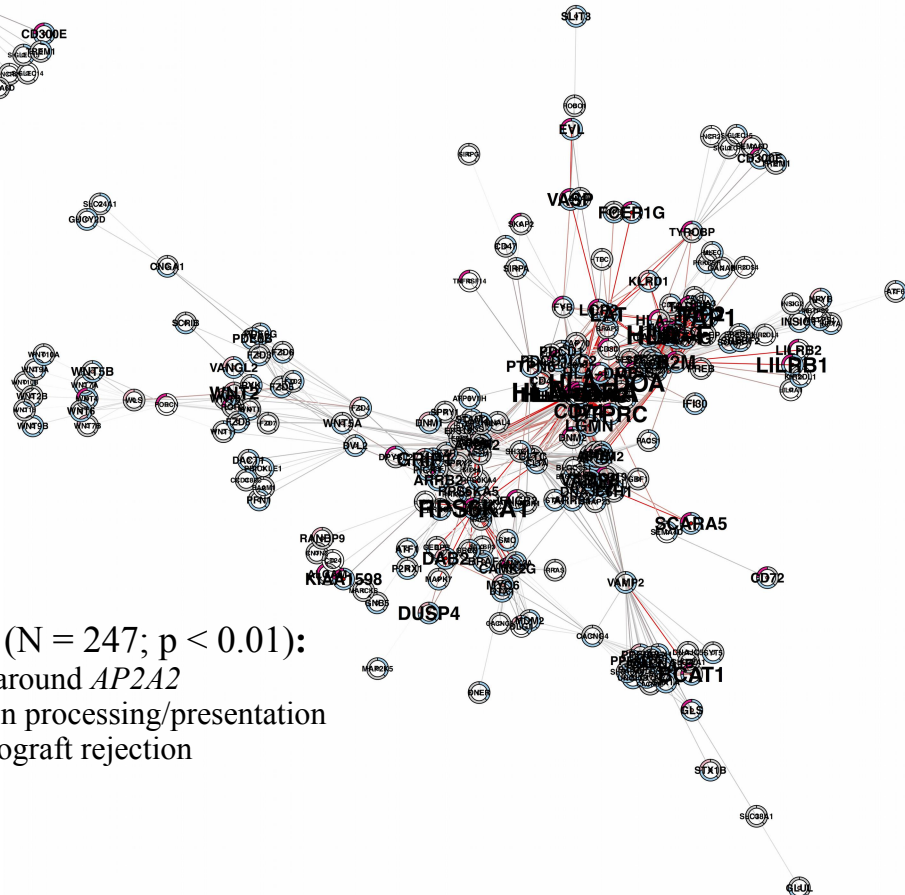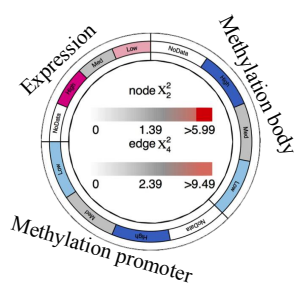

**C) Module 3 (N = 247; p < 0.01):**

Built around *AP2A2*

Involved in antigen processing/presentation and allograft rejection

**D) Module 4 (N = 221; p < 0.01):**

Built around *SLC35B3*

Involved in TGF-beta signaling, focal adhesion, and glycosaminoglycan biosynthesis

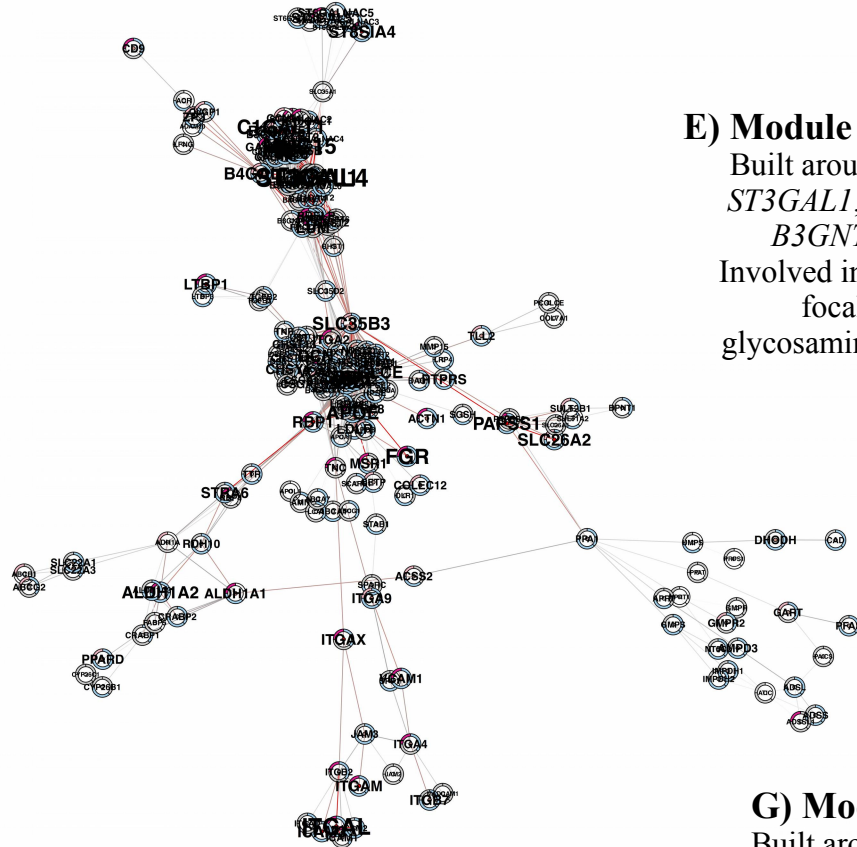

**E) Module 5 (N = 65; p < 0.01):**

Built around *B4GALT1*, *LUM*, *ST3GAL1*, *ST3GAL4*, *MUC15*, *B3GNT5*, and *C1GALT1*

Involved in TGF-beta signaling, focal adhesion, and glycosaminoglycan biosynthesis

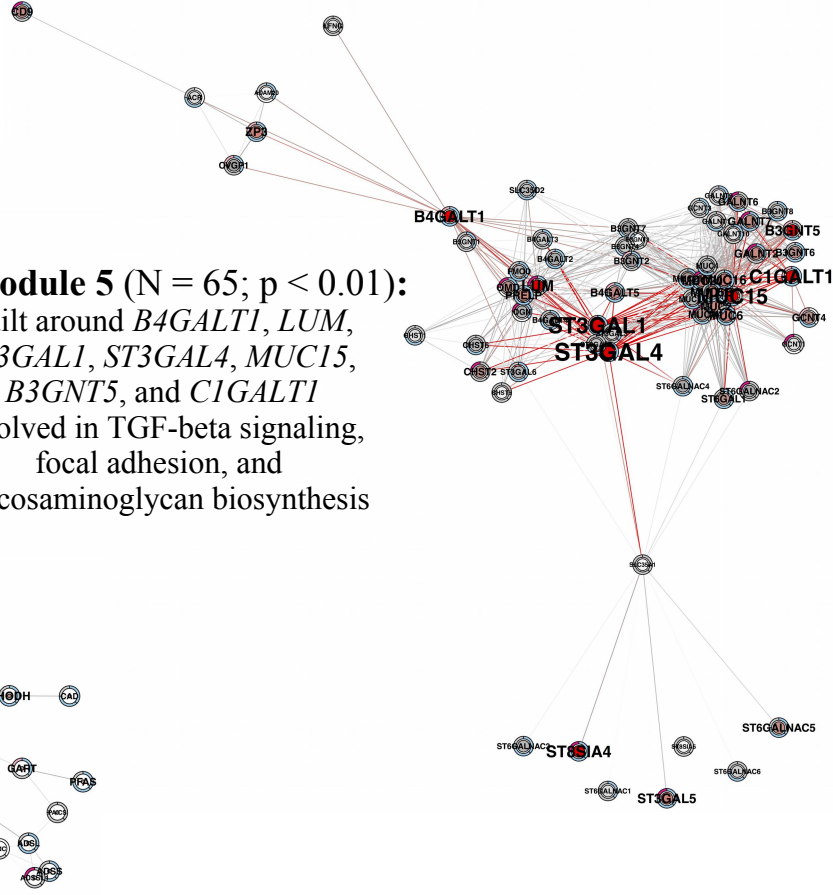

**F) Module 6 (N = 162; p < 0.01):**

Built around *ITGB3*

Involved in TGF-beta signaling, focal adhesion, and glycosaminoglycan biosynthesis

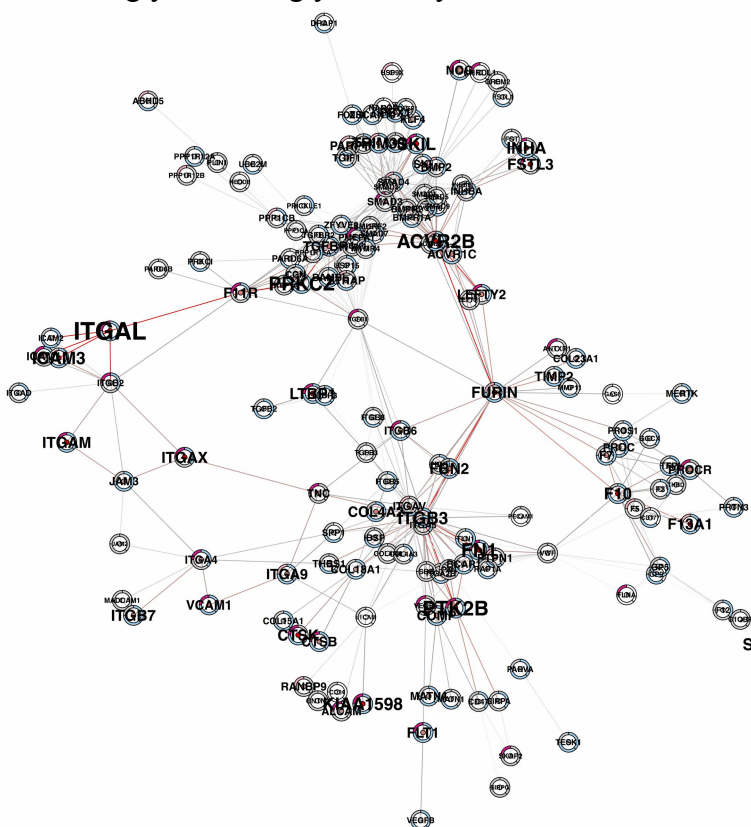

**G) Module 7 (N = 157; p < 0.01):**

Built around *GLCE*, *APOE*, *RBP1*, *ITGAM*, *SDC1*, *ITGAL*, *ITGAX*, *SDC4*, and *ICAM3*

Involved in TGF-beta signaling, focal adhesion, and glycosaminoglycan biosynthesis

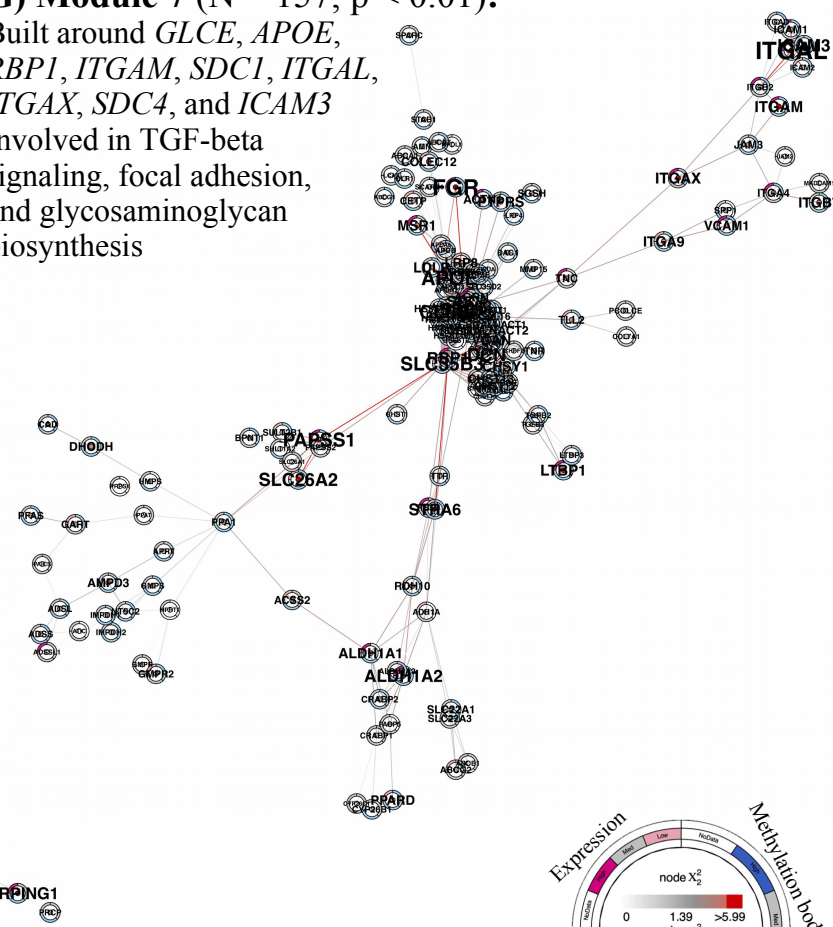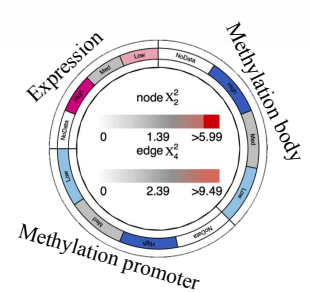

Supplement: 13148_2018_463_MOESM14_ESM.pdf [file 13148_2018_463_MOESM14_ESM.pdf]
