# Supplementary material for: Epigenetic regulation of placental gene expression in transcriptional subtypes of preeclampsia
Source: PubMed Central journal article supplement (PMC5833042; doi:10.1186/s13148-018-0463-6), 2018-03-02
Supplement: 13148_2018_463_MOESM2_ESM.pdf [file 13148_2018_463_MOESM2_ESM.pdf]

**Supplementary Table 1.** Continuous clinical characteristics of the 48 samples across the transcriptional clusters.

|                                                             | <b>Cluster 1<br/>N=19</b>    | <b>Cluster 2<br/>N=19</b> | <b>Cluster 3<br/>N=5</b> | <b>Cluster 5<br/>N=5</b> |                |
|-------------------------------------------------------------|------------------------------|---------------------------|--------------------------|--------------------------|----------------|
| <b>Clinical Attribute</b>                                   | <b>Mean (SD)<sup>1</sup></b> |                           |                          |                          | <b>P-value</b> |
| <b>Parental demographics</b>                                |                              |                           |                          |                          |                |
| Maternal age (years)                                        | 32.5 (4.6)                   | 35.1 (5.0)                | 37.0 (4.3)               | 31.6 (7.7)               | 0.19           |
| Maternal BMI (kg/m <sup>2</sup> )                           | 26.5 (5.6)                   | 26.1 (3.8)                | 24.9 (0.5)               | 24.7 (4.6)               | 0.79           |
| Maternal height (cm)                                        | 163 (6)                      | 163 (7)                   | 161 (5)                  | 161 (11)                 | 0.95           |
| <b>Uteroplacental blood flow/Ultrasound data</b>            |                              |                           |                          |                          |                |
| Mean uterine artery PI <sup>2</sup>                         | 0.86 (0.25)                  | 1.84 (0.33)               | 1.64 (0.65)              | --                       | 0.03           |
| Max uterine artery PI <sup>2</sup>                          | 1.02 (0.34)                  | 2.20 (0.26)               | 2.15 (0.79)              | --                       | 0.02           |
| Mean umbilical artery PI <sup>2</sup>                       | 0.98 (0.10)                  | 1.56 (0.42)               | 1.42 (0.35)              | 1.45 (0.11)              | < 0.01         |
| Max umbilical artery PI <sup>2</sup>                        | 1.10 (0.17)                  | 1.71 (0.40)               | 1.64 (0.32)              | 1.63 (0.24)              | < 0.01         |
| Mean middle cerebral artery PI <sup>2</sup>                 | 1.73 (0.11)                  | 1.47 (0.24)               | 1.49 (0.15)              | 1.85 (0.40)              | 0.03           |
| Min middle cerebral artery PI <sup>2</sup>                  | 1.58 (0.19)                  | 1.26 (0.19)               | 1.27 (0.13)              | 1.55 (0.31)              | 0.02           |
| Mean middle cerebral artery peak systolic velocity (cm/sec) | 54.3 (15.1)                  | 51.4 (11.1)               | 48.2 (12.0)              | 48.8 (6.3)               | 0.80           |
| Max middle cerebral artery peak systolic velocity (cm/sec)  | 58.8 (20.2)                  | 58.8 (11.3)               | 57.5 (9.6)               | 54.4 (8.1)               | 0.94           |
| Mean biophysical profile score (/10)                        | 7.86 (0.34)                  | 7.56 (0.69)               | 7.23 (0.92)              | 8.00 (0)                 | 0.21           |
| Min biophysical profile score (/10)                         | 7.56 (0.88)                  | 7.13 (1.02)               | 6.80 (1.10)              | 8.00 (0)                 | 0.27           |
| <b>Preeclampsia diagnostic criteria</b>                     |                              |                           |                          |                          |                |
| Max systolic pressure (mm Hg)                               | 137 (24)                     | 175 (17)                  | 160 (22)                 | 154 (23)                 | < 0.01         |
| Max diastolic pressure (mm Hg)                              | 86 (14)                      | 111 (13)                  | 98 (7)                   | 98 (12)                  | < 0.01         |
| Max mean arterial pressure (mm Hg)                          | 102 (16)                     | 131 (14)                  | 116 (11)                 | 116 (16)                 | < 0.01         |
| Max proteinuria level (dipstick)                            | +1.3 (1.3)                   | +3.5 (0.9)                | +2.0 (1.0)               | +2.8 (1.9)               | < 0.01         |
| <b>Fetal demographics</b>                                   |                              |                           |                          |                          |                |
| Gestational age at delivery (weeks)                         | 36 (3)                       | 31 (3)                    | 32 (4)                   | 33 (3)                   | < 0.01         |
| Newborn weight z-score                                      | 0.15 (1.06)                  | -1.51 (0.59)              | -1.77 (0.46)             | -1.25 (1.05)             | < 0.01         |
| Apgar score at 1 minute (/10)                               | 8.0 (1.5)                    | 7.5 (1.7)                 | 7.5 (1.7)                | 7.2 (2.4)                | 0.50           |
| Apgar score at 5 minutes (/10)                              | 8.8 (0.5)                    | 8.9 (0.4)                 | 8.8 (0.5)                | 8.4 (1.3)                | 0.87           |
| <b>Placental and umbilical cord data</b>                    |                              |                           |                          |                          |                |
| Placental weight z-score                                    | -0.06 (0.89)                 | -1.40 (0.74)              | -1.58 (0.70)             | -1.00 (0.80)             | < 0.01         |
| Placental thickness (cm)                                    | 3.18 (0.72)                  | 2.38 (1.43)               | 1.86 (0.80)              | 2.20 (0.23)              | < 0.01         |
| Placental asymmetry (ratio)                                 | 0.12 (0.09)                  | 0.16 (0.09)               | 0.13 (0.08)              | 0.21 (0.13)              | 0.35           |
| Cord insertion distance from placental margin (cm)          | 3.93 (1.17)                  | 2.32 (0.86)               | 2.70 (1.03)              | 2.80 (0.75)              | 0.01           |
| Cord diameter (cm)                                          | 1.30 (0.25)                  | 1.16 (0.42)               | 0.86 (0.23)              | 1.16 (0.23)              | 0.03           |

<sup>1</sup>Only included if values were available for at least 3 samples in the cluster

<sup>2</sup>PI = pulsatility index
