# Supplementary material for: Epigenetic regulation of placental gene expression in transcriptional subtypes of preeclampsia
Source: PubMed Central journal article supplement (PMC5833042; doi:10.1186/s13148-018-0463-6), 2018-03-02
Supplement: 13148_2018_463_MOESM5_ESM.pdf [file 13148_2018_463_MOESM5_ESM.pdf]

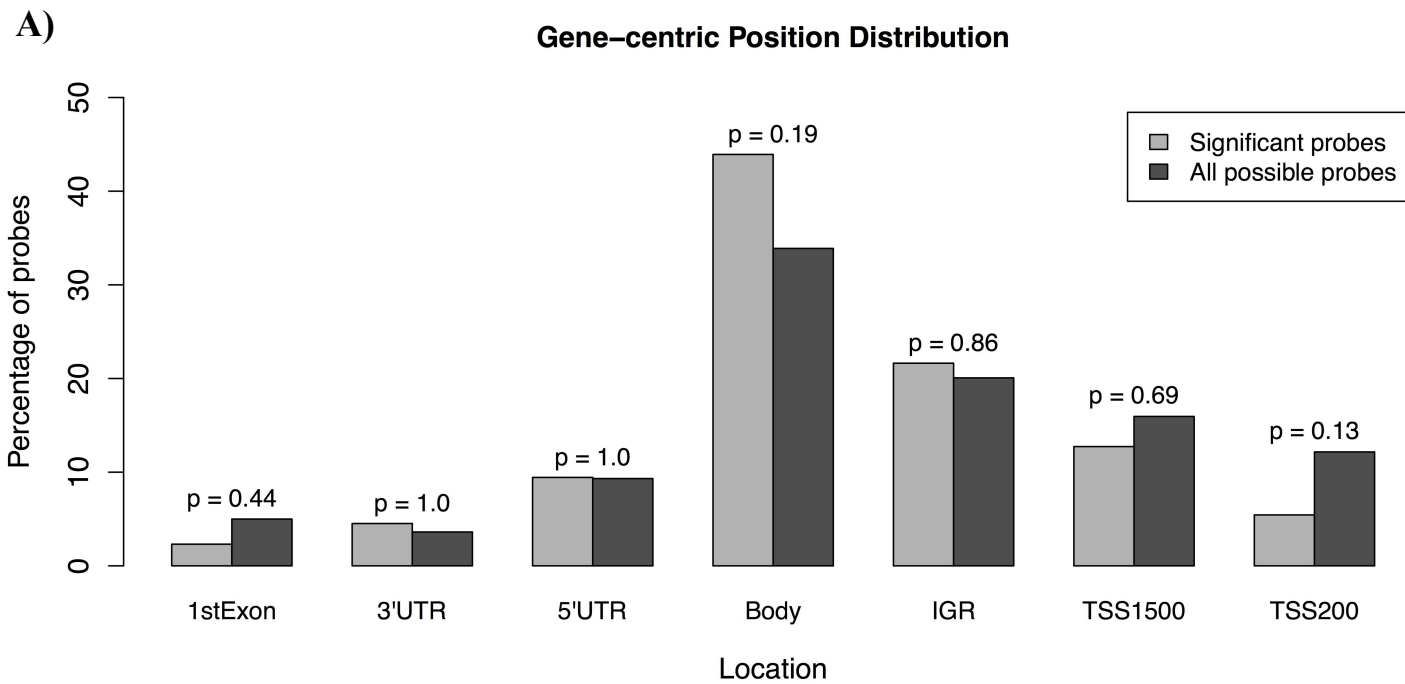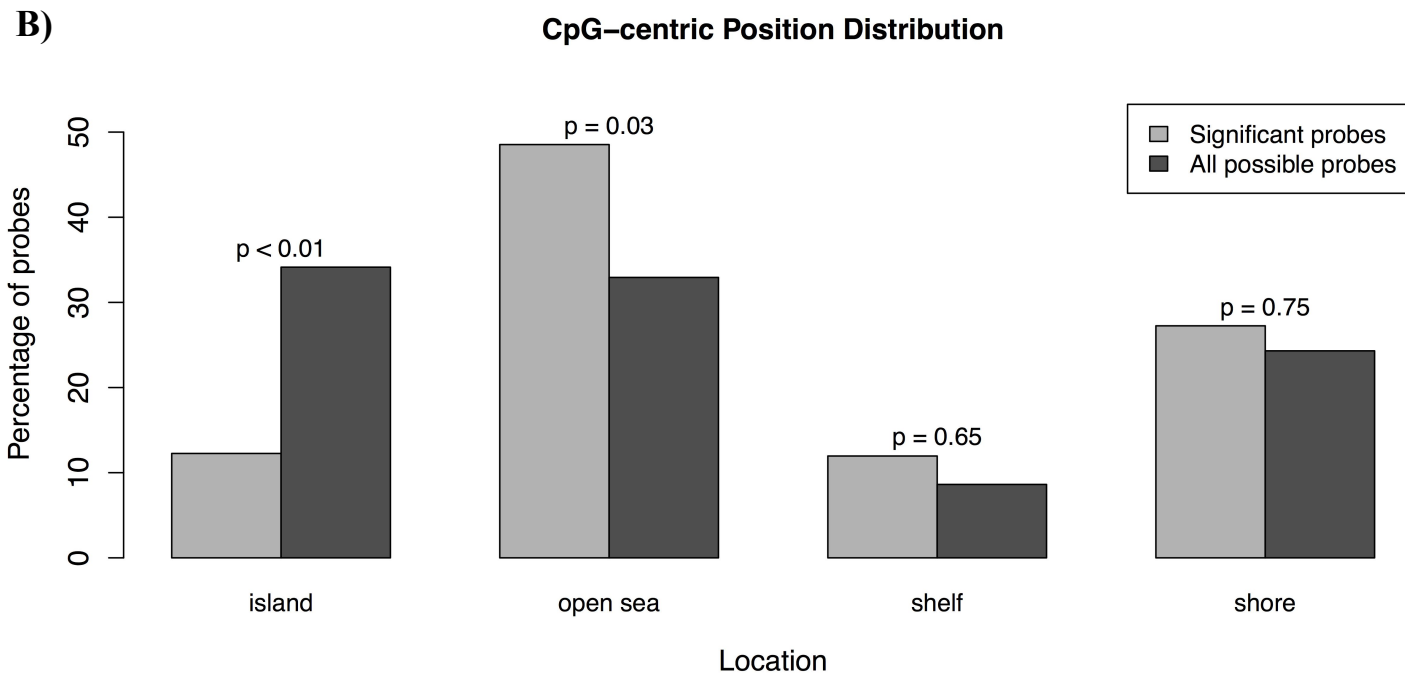

**Supplementary Figure 2.** Distribution of significantly differentially methylated positions in transcriptional cluster 2 (versus transcriptional cluster 1, corrected for fetal sex and gestational age) (light grey) compared to the full set of possible methylation probes (dark grey), in terms of their **(A)** gene region locations and **(B)** CpG region locations. P-values were obtained from Fisher's exact tests.
