# Supplementary material for: Epigenetic regulation of placental gene expression in transcriptional subtypes of preeclampsia
Source: PubMed Central journal article supplement (PMC5833042; doi:10.1186/s13148-018-0463-6), 2018-03-02
Supplement: 13148_2018_463_MOESM7_ESM.pdf [file 13148_2018_463_MOESM7_ESM.pdf]

A)

## Gene-centric Position Distribution

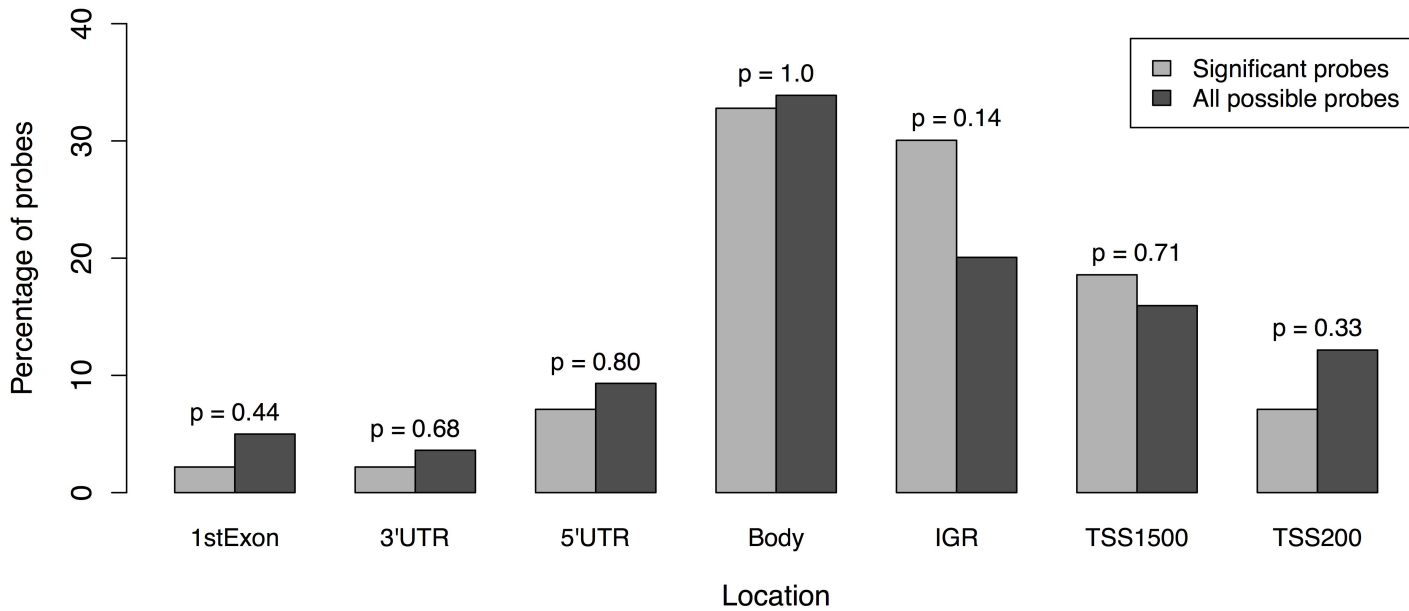

B)

## CpG-centric Position Distribution

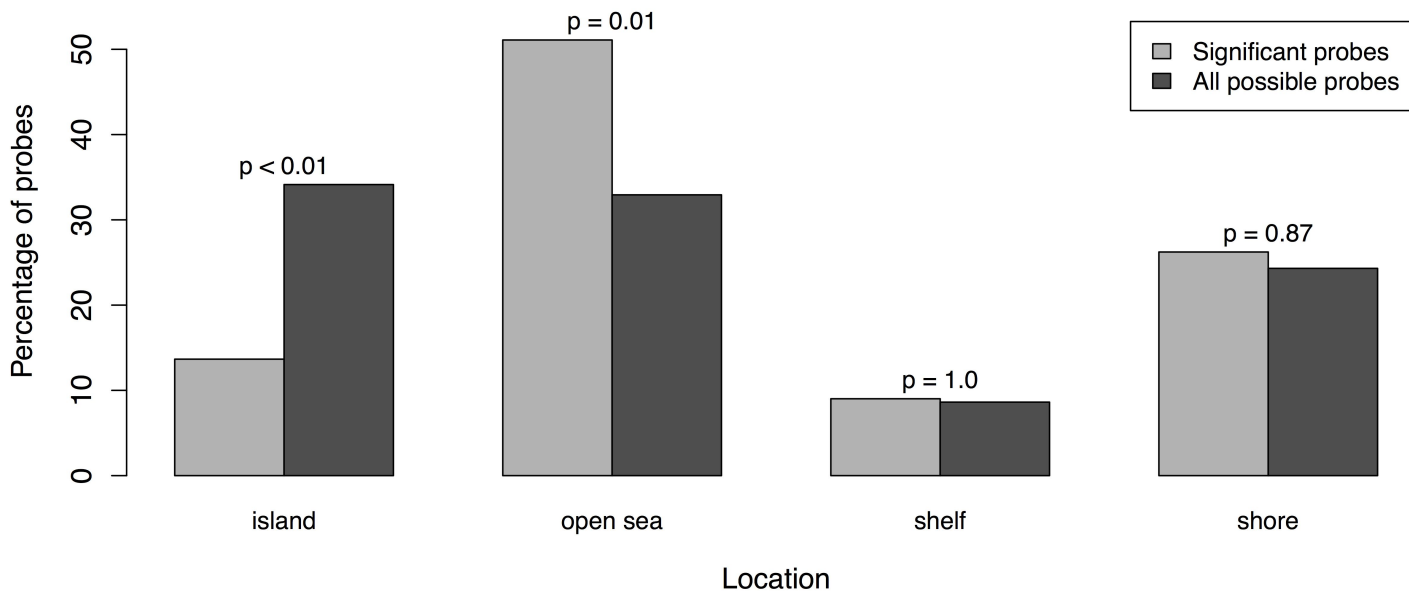

**Supplementary Figure 3.** Distribution of significantly differentially methylated positions in transcriptional cluster 3 (versus transcriptional cluster 1, corrected for fetal sex and gestational age) (light grey) compared to the full set of possible methylation probes (dark grey), in terms of their (A) gene region locations and (B) CpG region locations. P-values were obtained from Fisher's exact tests.
