# Supplementary material for: Epigenetic regulation of placental gene expression in transcriptional subtypes of preeclampsia
Source: Clin Epigenetics. 2018 Mar 2;10:28. doi: 10.1186/s13148-018-0463-6 (PMC5833042; doi:10.1186/s13148-018-0463-6)
Supplement: Supplementary file 3 — Table S2. Categorical clinical characteristics of the 48 samples across the transcriptional clusters (PDF 79 kb) [file 13148_2018_463_MOESM3_ESM.pdf]

**Supplementary Table 2.** Categorical clinical characteristics of the 48 samples across the transcriptional clusters.

|                                 | Cluster 1<br>N=19                        | Cluster 2<br>N=19 | Cluster 3<br>N=5 | Cluster 5<br>N=5 |         |
|---------------------------------|------------------------------------------|-------------------|------------------|------------------|---------|
| Clinical Attribute              | Percentage of Cluster (n/N) <sup>1</sup> |                   |                  |                  | P-value |
| Parental demographics           |                                          |                   |                  |                  |         |
| Nulliparous                     | 42 (8/19)                                | 68 (13/19)        | 20 (1/5)         | 40 (2/5)         | 0.19    |
| Previous miscarriage            | 26 (5/19)                                | 32 (6/19)         | 40 (2/5)         | 20 (1/5)         | 0.96    |
| Previous termination            | 32 (6/19)                                | 21 (4/19)         | 20 (1/5)         | 20 (1/5)         | 0.95    |
| Previous hypertensive pregnancy | 36 (4/11)                                | 100 (4/4)         | 50 (2/4)         | 50 (1/2)         | 0.20    |
| Maternal race                   |                                          |                   |                  |                  | 0.08    |
| White                           | 67 (12/18)                               | 37 (7/19)         | 20 (1/5)         | 100 (5/5)        | --      |
| Black                           | 0 (0/18)                                 | 26 (5/19)         | 40 (2/5)         | 0 (0/5)          |         |
| Asian                           | 28 (5/18)                                | 26 (5/19)         | 40 (2/5)         | 0 (0/5)          |         |
| East Indian                     | 6 (1/18)                                 | 5 (1/19)          | 0 (0/5)          | 0 (0/5)          |         |
| Paternal race                   |                                          |                   |                  |                  | 0.22    |
| White                           | 100 (7/7)                                | 33 (3/9)          | 33 (1/3)         | 100 (3/3)        | --      |
| Black                           | 0 (0/7)                                  | 22 (2/9)          | 33 (1/3)         | 0 (0/3)          |         |
| Asian                           | 0 (0/7)                                  | 22 (2/9)          | 33 (1/3)         | 0 (0/3)          |         |
| East Indian                     | 0 (0/7)                                  | 11 (1/9)          | 0 (0/3)          | 0 (0/3)          |         |
| Maternal blood type             |                                          |                   |                  |                  | 0.09    |
| A                               | 21 (4/19)                                | 39 (7/18)         | 60 (3/5)         | 0 (0/5)          | --      |
| B                               | 26 (5/19)                                | 33 (6/18)         | 40 (2/5)         | 0 (0/5)          |         |
| O                               | 47 (9/19)                                | 22 (4/18)         | 0 (0/5)          | 80 (4/5)         |         |
| AB                              | 5 (1/19)                                 | 6 (1/18)          | 0 (0/5)          | 20 (1/5)         |         |
| Rh positive                     | 16 (3/19)                                | 6 (1/17)          | 20 (1/5)         | 20 (1/5)         | 0.55    |
| BMI > 25 kg/m <sup>2</sup>      | 58 (11/19)                               | 67 (10/15)        | 67 (2/3)         | 60 (3/5)         | 0.95    |
| Chronic hypertension            | 11 (2/19)                                | 32 (6/19)         | 60 (3/5)         | 20 (1/5)         | 0.09    |
| Ultrasound data                 |                                          |                   |                  |                  |         |
| Placenta position on ultrasound |                                          |                   |                  |                  | 0.34    |
| Anterior                        | 29 (2/7)                                 | 60 (6/10)         | 67 (2/3)         | 67 (2/3)         | --      |
| Posterior                       | 71 (5/7)                                 | 10 (1/10)         | 33 (1/3)         | 33 (1/3)         |         |
| Amniotic fluid deficiency       | 0 (0/4)                                  | 43 (3/7)          | 67 (2/3)         | 0 (0/2)          | 0.24    |
| Diagnoses                       |                                          |                   |                  |                  |         |
| Preeclampsia                    | 32 (6/19)                                | 89 (17/19)        | 60 (3/5)         | 80 (4/5)         | < 0.01  |
| HELLP <sup>2</sup>              | 0 (0/19)                                 | 26 (5/19)         | 0 (0/5)          | 0 (0/5)          | 0.07    |
| Fetal growth restriction        | 0 (0/19)                                 | 53 (10/19)        | 80 (4/5)         | 40 (2/5)         | < 0.01  |
| Chorioamnionitis                | 0 (0/19)                                 | 0 (0/19)          | 0 (0/5)          | 0 (0/5)          | 1       |
| Labor and Delivery              |                                          |                   |                  |                  |         |
| Attempted vaginal delivery      | 63 (12/19)                               | 26 (5/19)         | 0 (0/5)          | 60 (3/5)         | 0.02    |
| Vaginal delivery                | 42 (8/19)                                | 11 (2/19)         | 0 (0/5)          | 20 (1/5)         | 0.07    |
| Delivery < 34 weeks             | 21 (4/19)                                | 84 (16/19)        | 40 (2/5)         | 60 (3/5)         | < 0.01  |
| Delivery < 37 weeks             | 32 (6/19)                                | 95 (18/19)        | 100 (5/5)        | 100 (5/5)        | < 0.01  |

| <b>Fetal demographics</b>                         |            |            |          |          |        |
|---------------------------------------------------|------------|------------|----------|----------|--------|
| Male fetus                                        | 68 (13/19) | 53 (10/19) | 20 (1/5) | 40 (2/5) | 0.25   |
| AGA <sup>2</sup> (10-90 <sup>th</sup> percentile) | 95 (18/19) | 32 (6/19)  | 20 (1/5) | 40 (2/5) | < 0.01 |
| SGA <sup>2</sup> (<10 <sup>th</sup> percentile)   | 0 (0/19)   | 68 (13/19) | 80 (4/5) | 60 (3/5) | < 0.01 |
| NICU <sup>2</sup> transfer                        | 5 (1/19)   | 58 (11/19) | 80 (4/5) | 20 (1/5) | < 0.01 |

<sup>1</sup>All available data was utilized, however, information was missing for some samples for some characteristics. Complete data is indicated by N=19 for cluster 1, N=19 for cluster 2, N=5 for cluster 3, and N=5 for cluster 5

<sup>2</sup>HELLP = hemolysis, elevated liver enzymes, and low platelets syndrome; AGA = average-for-gestational-age; SGA = small-for-gestational-age; NICU = neonatal intensive care unit
